# Supplementary material for: Erastin, a ferroptosis-inducing agent, sensitized cancer cells to X-ray irradiation via glutathione starvation in vitro and in vivo
Source: PubMed Central journal article supplement (PMC6892486; doi:10.1371/journal.pone.0225931), 2019-12-04
Supplement: pone.0225931.s003.pdf [file pone.0225931.s003.pdf]

HeLa

GPX4

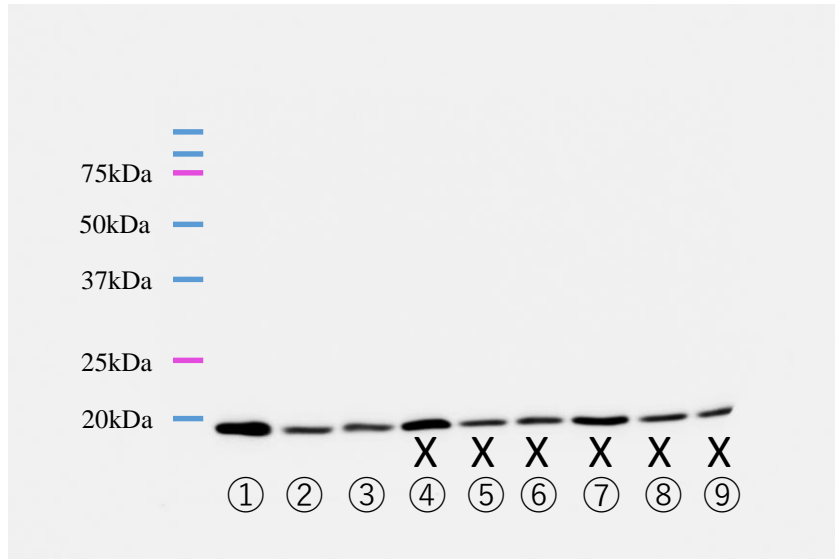

①,④,⑦ : Control

②,⑤,⑧ : 5  $\mu$ M Erastin

③,⑥,⑨ : 10  $\mu$ M Erastin

$\beta$ -actin

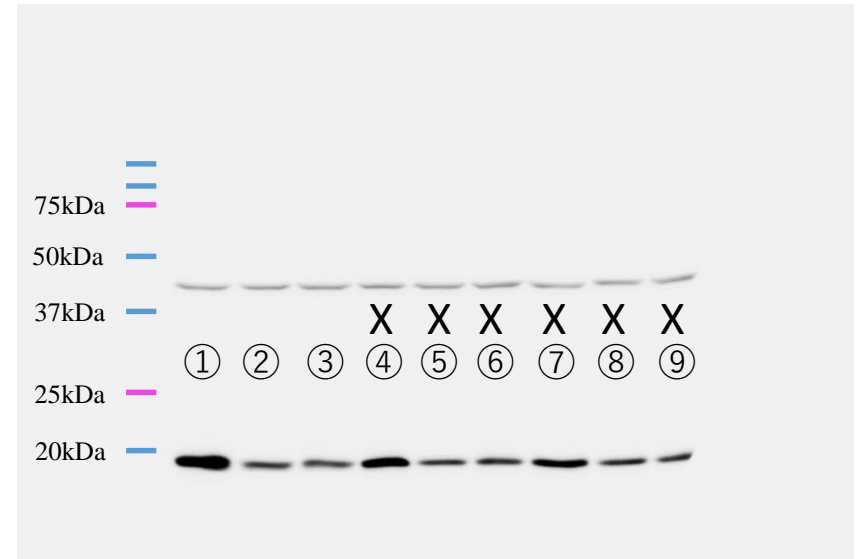

NCI-H1975

GPX4

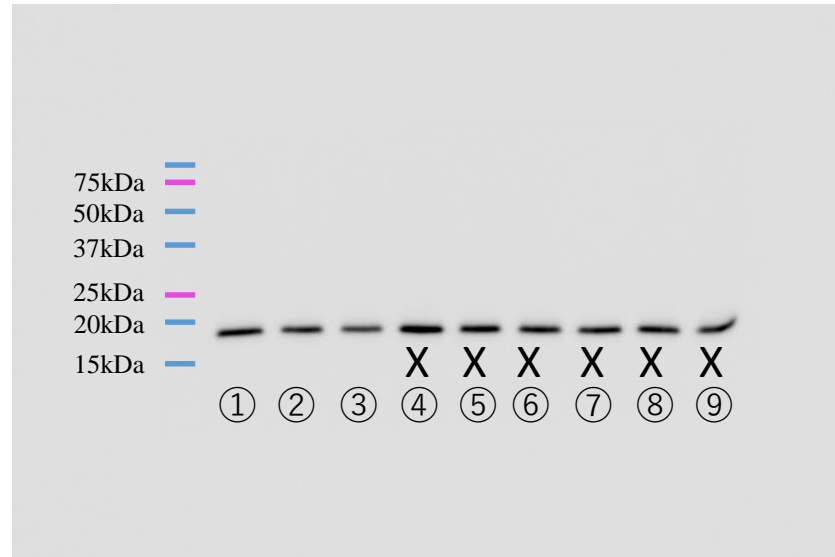

①,④,⑦ : Control

②,⑤,⑧ : 5  $\mu$ M Erastin

③,⑥,⑨ : 10  $\mu$ M Erastin

$\beta$ -actin

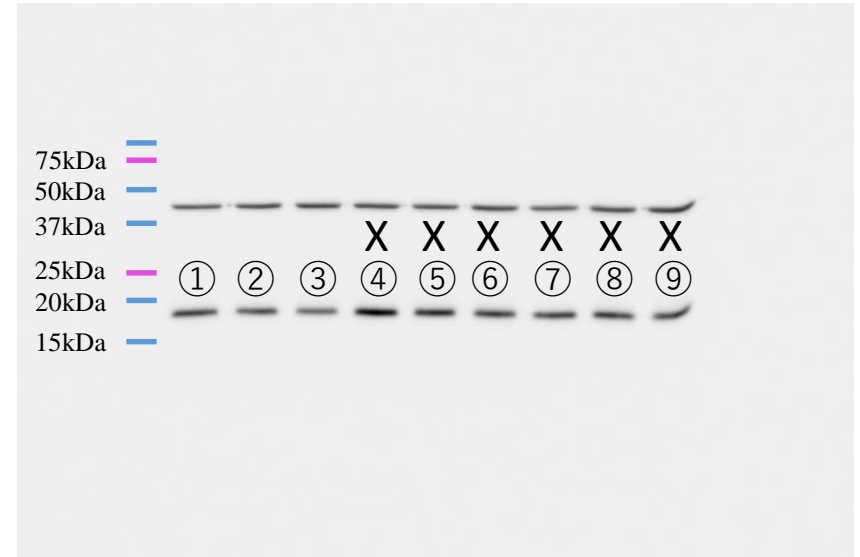

HeLa

TfR1

$\beta$ -actin

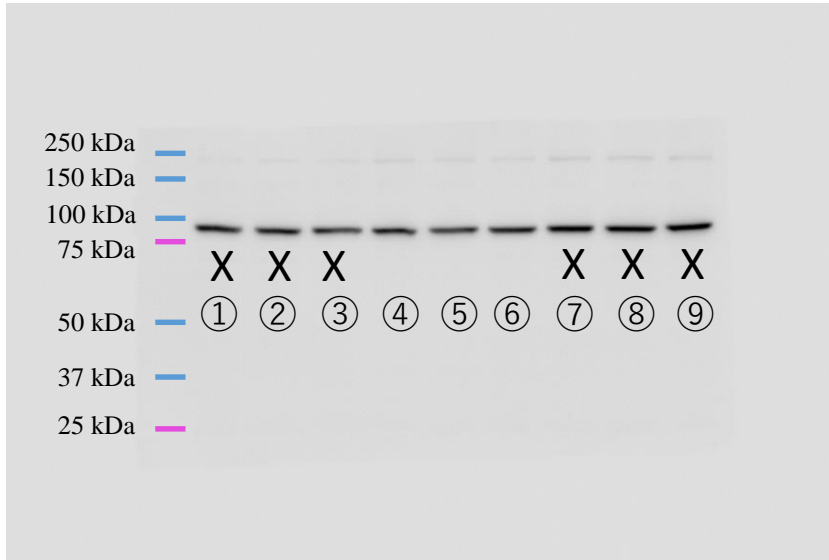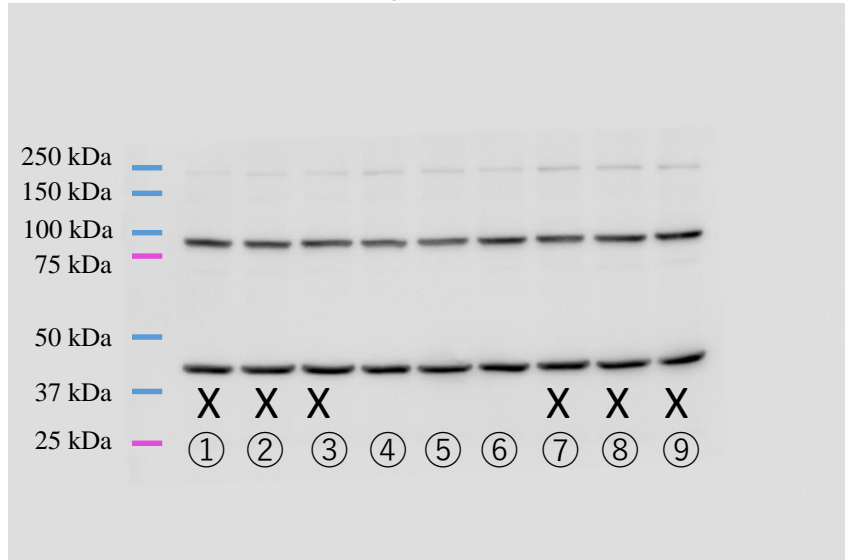

①,④,⑦ : Control

②,⑤,⑧ : 2  $\mu$ M Erastin

③,⑥,⑨ : 10  $\mu$ M Erastin

NCI-H1975

TfR1

$\beta$ -actin

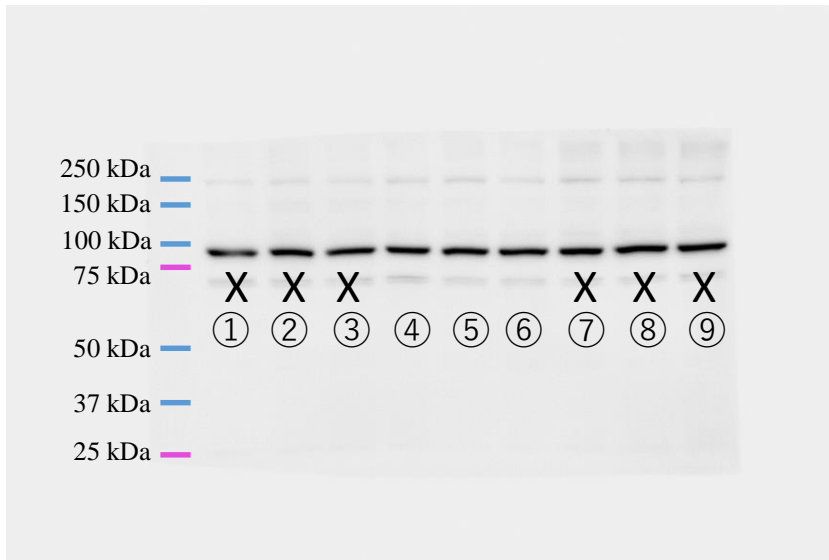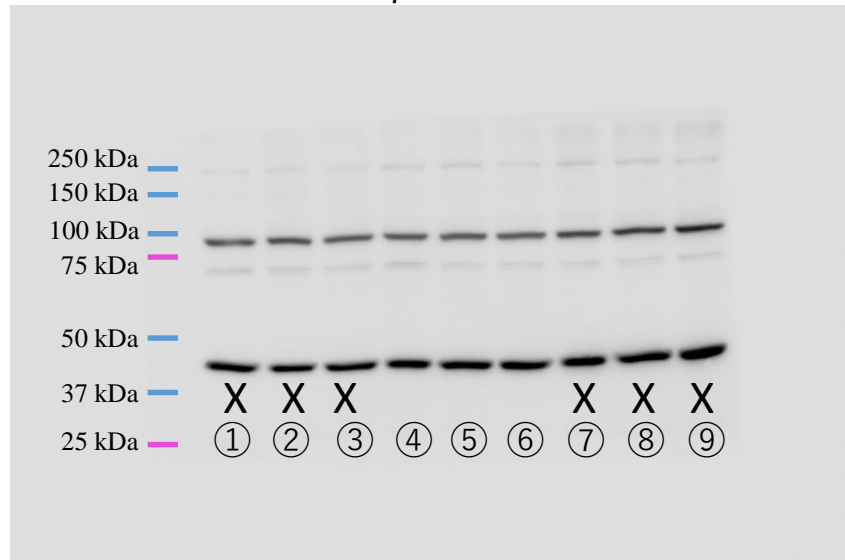

①,④,⑦ : Control

②,⑤,⑧ : 2  $\mu$ M Erastin

③,⑥,⑨ : 10  $\mu$ M Erastin
